# Supplementary material
Source: MDPI journal article supplement (https://www.mdpi.com/search?q=cancers-11-01663)
Supplement: s001 [file cancers-11-01663-s001.pdf]

## Supplementary Materials

## The Actin Binding Protein Plastin-3 Is Involved in the Pathogenesis of Acute Myeloid Leukemia

Arne Velthaus, Kerstin Cornils, Jan K. Hennigs, Saskia Grüb, Hauke Stamm, Daniel Wicklein, Carsten Bokemeyer, Michael Heuser, Sabine Windhorst, Walter Fiedler and Jasmin Wellbrock

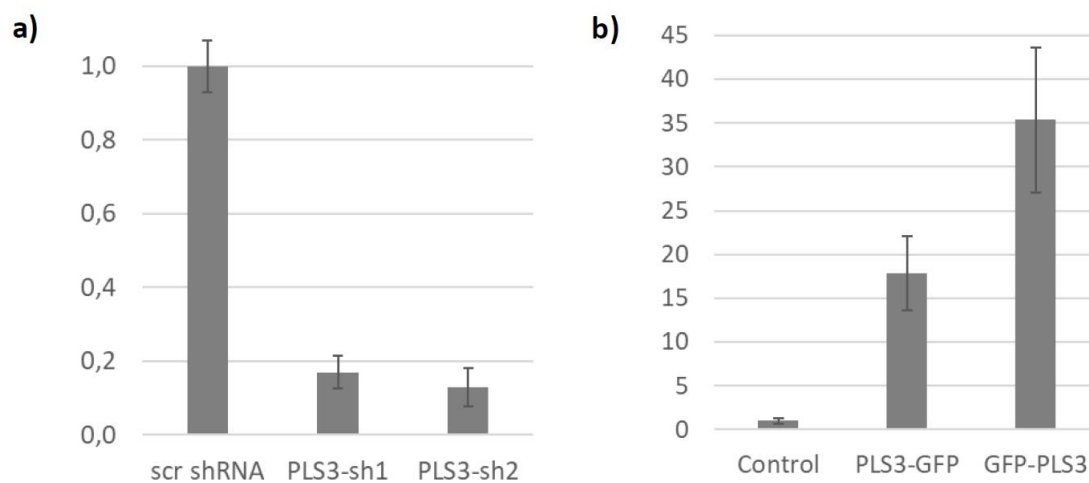

**Figure S1.** Knockdown and overexpression efficiency of PLS3 in Kasumi-1 cells.

**Table 1.** Microarray data of PLS3 gene expression alteration in the co-culture condition.

| Sample | Expression alteration in co-culture vs. mono-culture |
|--------|------------------------------------------------------|
| AML-1  | 6,00                                                 |
| AML-2  | 1,85                                                 |
| AML-3  | 2,05                                                 |
| CD34-1 | 1,14                                                 |
| CD34-2 | 0,42                                                 |
| CD34-3 | 0,44                                                 |

**Table S2.** Genes and non-coding RNAs down-regulated in the PLS3 knockdown cells.

| <i>Gene</i>                  | <i>Fold Change</i> | <i>FDR</i> |
|------------------------------|--------------------|------------|
| <i>ENPP3</i>                 | 0.5                | <0.001     |
| <i>FEZ1</i>                  | 0.5                | <0.001     |
| <i>KIAA1751</i>              | 0.5                | <0.001     |
| <i>MAP3K7CL</i>              | 0.5                | <0.001     |
| <i>MMRN1</i>                 | 0.5                | <0.001     |
| <i>POU4F3</i>                | 0.5                | <0.001     |
| <i>RGMB-AS1</i>              | 0.5                | <0.001     |
| <i>RSPH10B</i>               | 0.5                | <0.001     |
| <i>RSPH10B2</i>              | 0.5                | <0.001     |
| <i>SEC14L5</i>               | 0.25               | <0.001     |
| <i>SEPT3</i>                 | 0.5                | <0.001     |
| <b><i>Non-coding RNA</i></b> |                    |            |
| <i>RGMB-AS1</i>              | 0.5                | <0.001     |
| <i>SMARCA5-AS1</i>           | 0.5                | <0.001     |

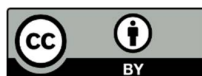

© 2019 by the authors. Licensee MDPI, Basel, Switzerland. This article is an open access article distributed under the terms and conditions of the Creative Commons Attribution (CC BY) license (<http://creativecommons.org/licenses/by/4.0/>).
